# Supplementary material for: Angiotensin II-Induced Long Non-Coding RNA Alivec Regulates Chondrogenesis in Vascular Smooth Muscle Cells
Source: MDPI journal article supplement (doi:10.3390/cells10102696), 2021-10-09
Supplement: s1 [file s1]

**Supplementary Materials (Figures and Tables) for Vishnu Amaram Samara, et al.**

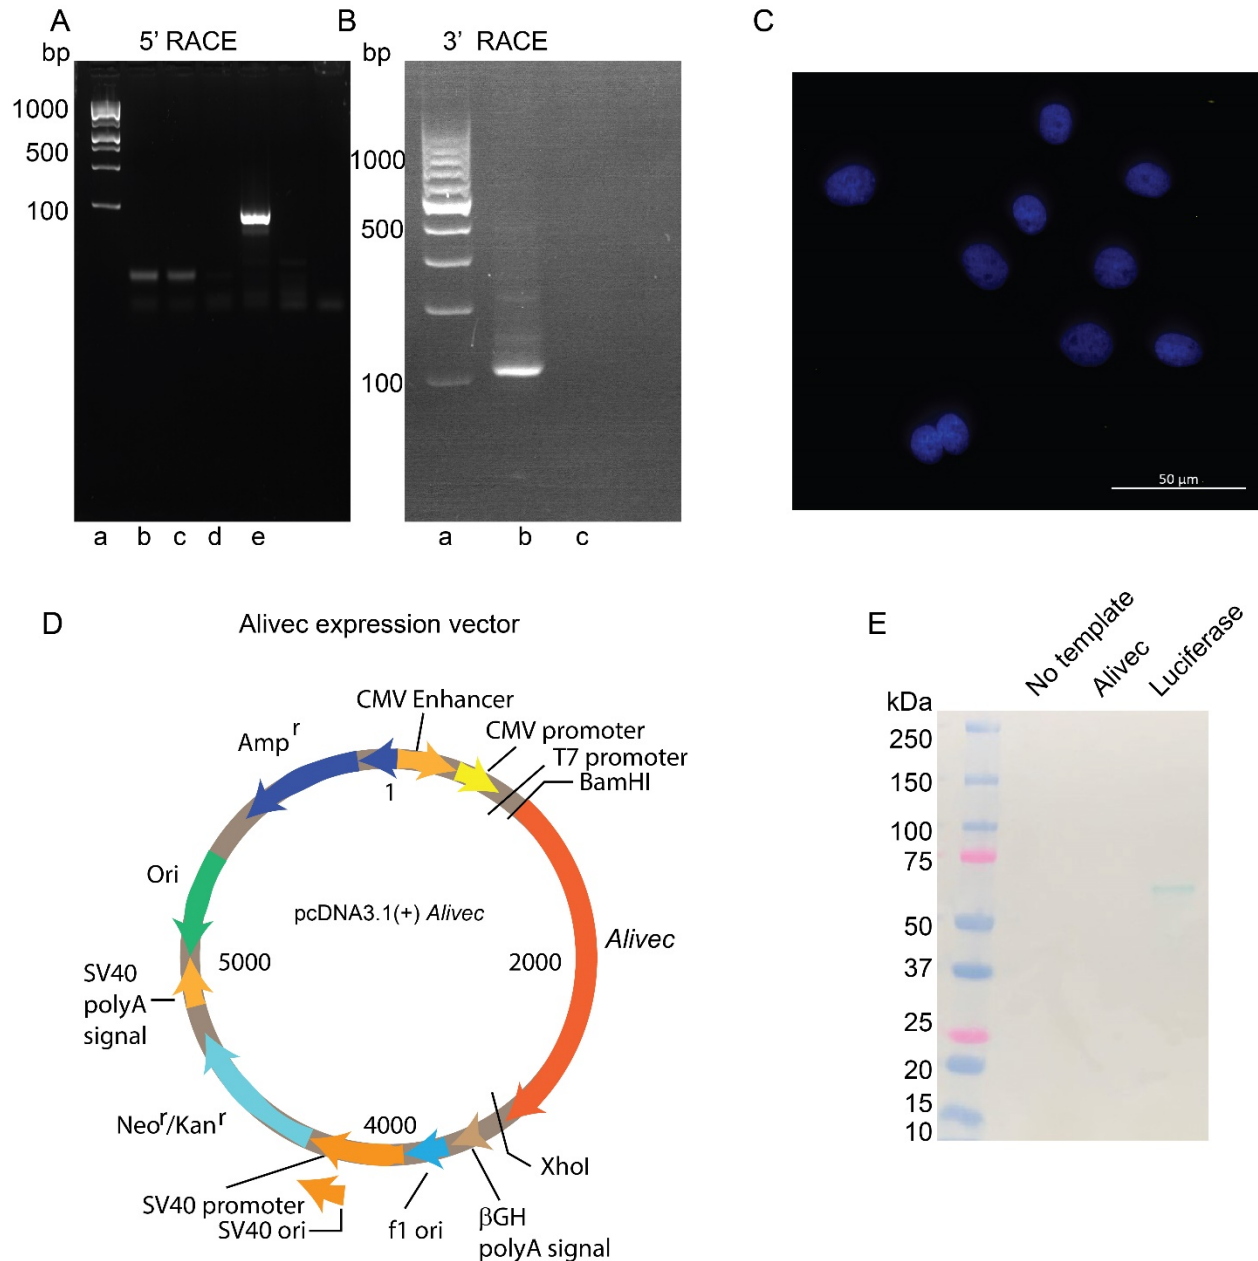

**Supplementary Figure S1. *Alivec* characterization and full-length cloning**

A) Representative agarose gel image of 5' RACE of *Alivec* (lane a - 100bp DNA ladder, b - no template PCR, c - 5' outer *Alivec* RACE-PCR, d - empty lane, e - 5' inner *Alivec* RACE-PCR that was chosen for Sanger sequencing. (the faint bands at lower mol wt. of ~20bp in lanes b and c are artifacts that could be from primer dimers or reaction mixture) B) Representative agarose gel image of 3' end RACE products of *Alivec* (a - 100 bp DNA ladder, b - 3' *Alivec* RACE-PCR chosen for

Sanger sequencing, c – no template PCR). C) Control image of RNA-FISH with no probes showing absence of spots in VSMC; nuclei are stained with DAPI (blue), Scale bars represent 50µm. D) Plasmid map of *Alivec* sequence cloned into pcDNA3.1+ overexpression vector to generate pcDNA*Alivec* plasmid. E) *In vitro* transcription/translation assay with pcDNA*Alivec* plasmid performed using T7 TNT Quick coupled transcription/translation system (Promega). T7 luciferase plasmid was used as positive control and no template pcDNA plasmid as negative control.

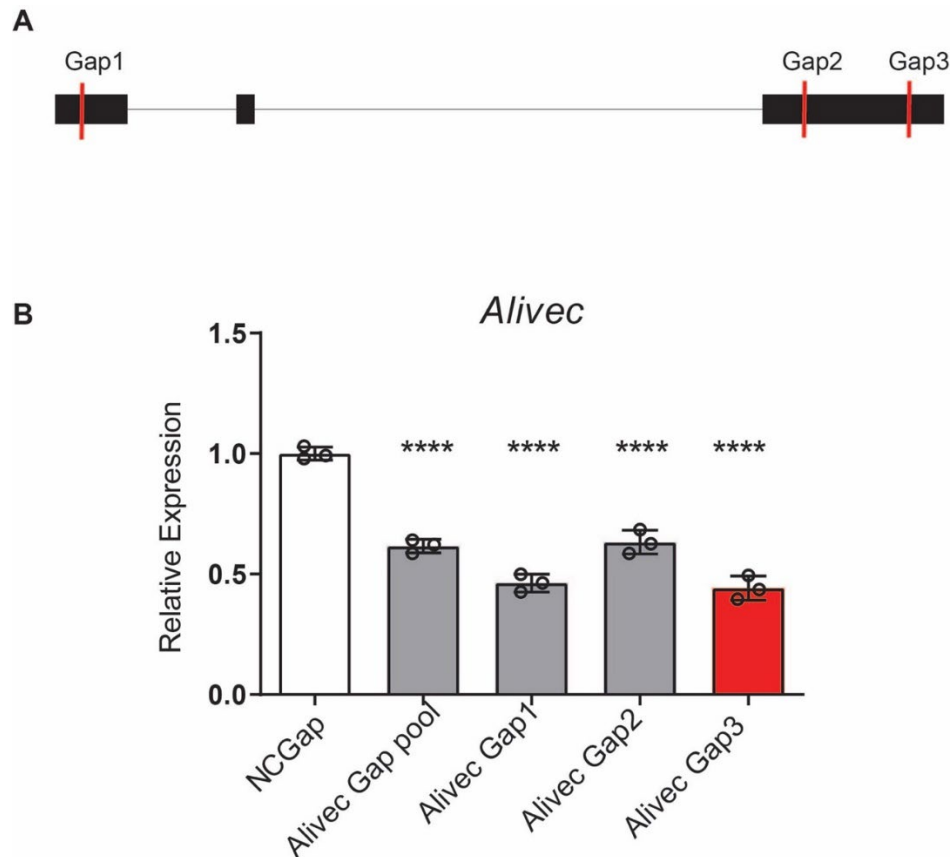

**Supplementary Figure S2. Design and efficacy of LNA-GapmeRs targeting *Alivec***

A) Three GapmeRs (Gap1, Gap2, Gap3) were designed using the Qiagen-Exiqon GapmeR designer tool to target three indicated regions of the *Alivec* transcript sequence. B) RT-qPCR analysis of *Alivec* in RVSMCs 48 hours post transfection with GapmeRs targeting *Alivec* or non-targeting GapmeR (NCGap) at 100nM. Individual GapmeRs and a pool of these GapmeRs were tested for knockdown efficiency of *Alivec* in the presence of Ang II (100nM, 3 hour). *Alivec*Gap3 was most effective and was used for subsequent knockdown experiments (*Alivec*Gap). Data presented as mean  $\pm$  SD, n=3 biological replicates, one-way ANOVA with Dunnett's multiple comparisons test, \*\*\*\*p<0.0001 versus NCGap.

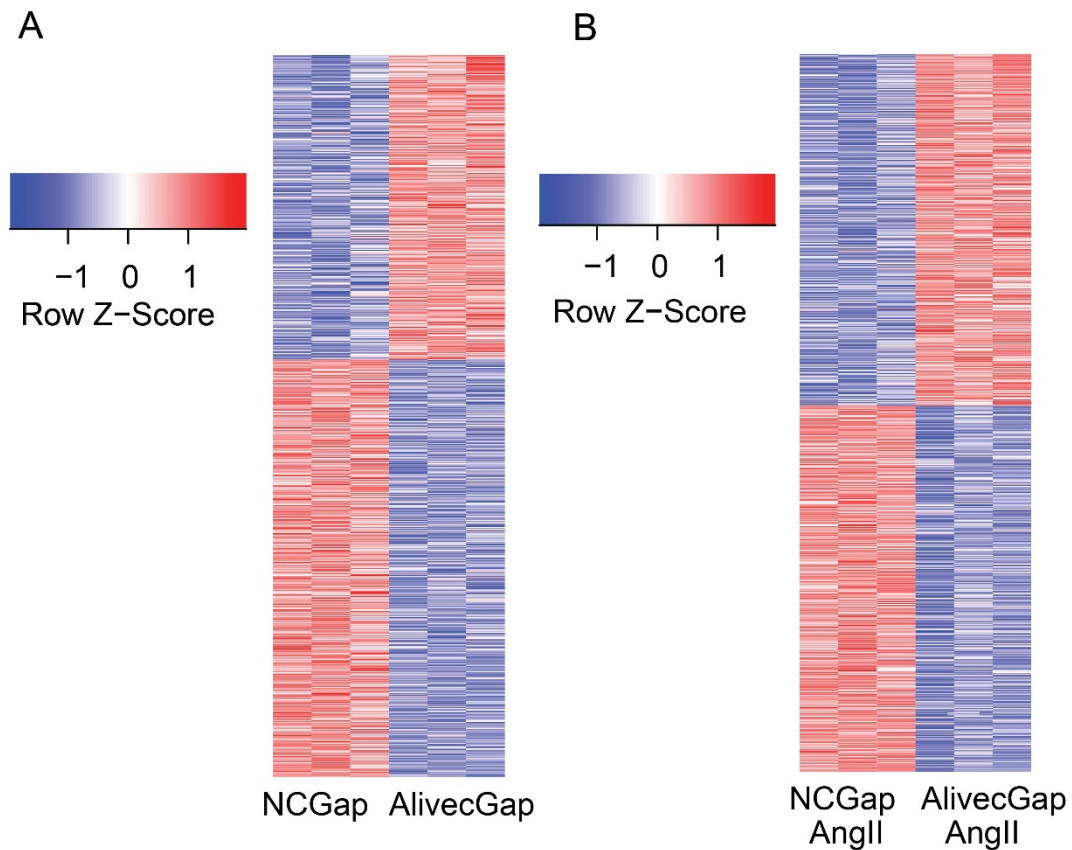

**Supplementary Figure S3. Microarray profiling in RVSMCs treated with NCGap and AliveGap**

A, B) Heat map of differentially expressed genes from RVSMCs transfected with AliveGap or NCGap and treated without (A) or with (B) Ang II (100 nM). n=3 per group. Cut off value: fold change  $\geq 1.20$ , p value  $< 0.05$

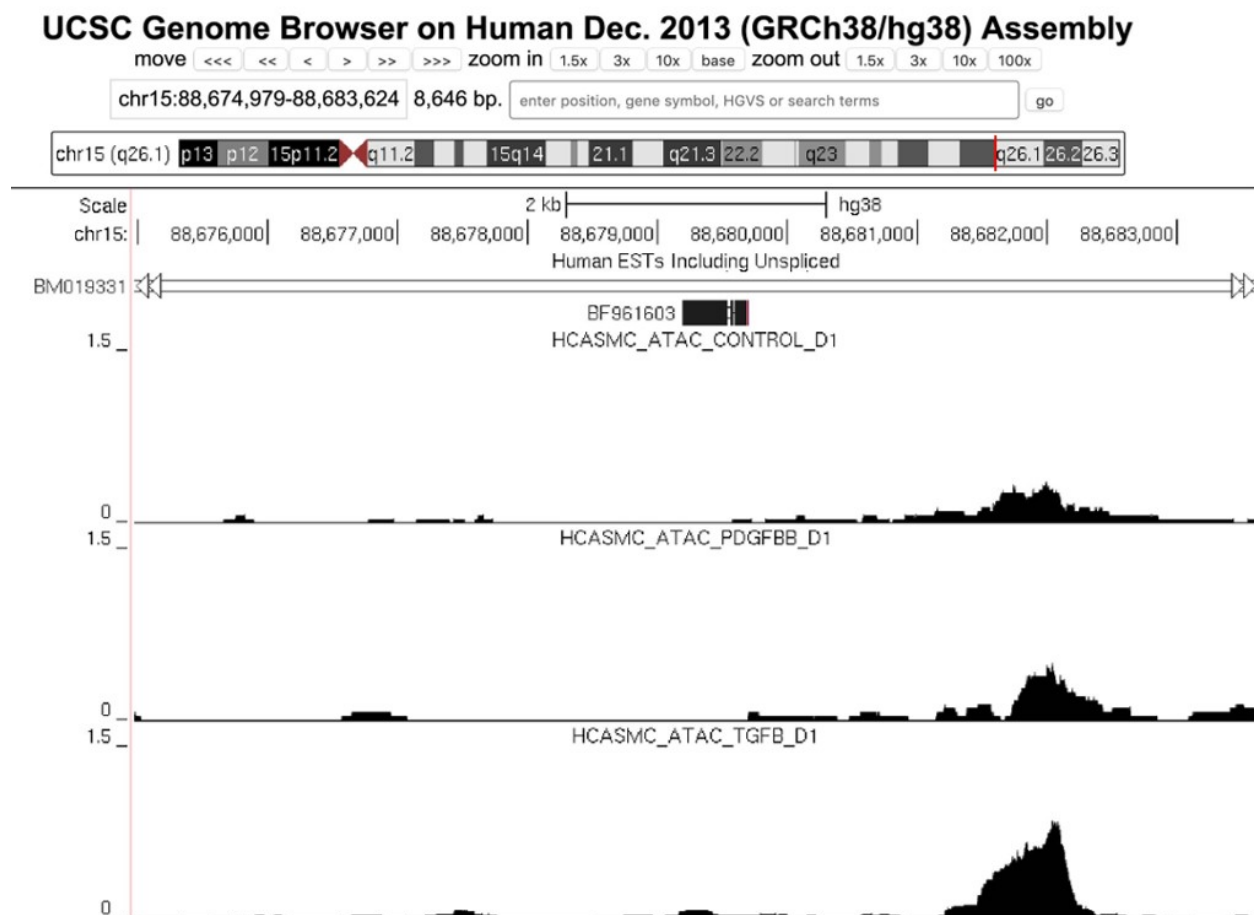

**Supplementary Figure S4. Chromatin accessibility at putative human *ALIVEC* locus in Human Coronary Artery Smooth Muscle Cells (HCASMCs)**

Normalized ATAC-seq tracks generated from HCASMCs under control, and PDGF-BB or TGFB treated conditions. Tracks were adapted through UCSC genome browser from <https://pubmed.ncbi.nlm.nih.gov/27386823/>. ATACseq represents Assay for Transposase-Accessible Chromatin using sequencing, PDGFBB and TGFB indicates platelet derived growth factor and transforming growth factor-beta.

**Supplementary Table S1. Primers sequences used in the study**

| <b>Rat gene<br/>qPCR primers</b>   | Forward                      | Reverse                |
|------------------------------------|------------------------------|------------------------|
| <i>Alivec</i>                      | CTGCCCTTCTTTTCACCATGC        | GCGGTACACCTGAAGCTAGT   |
| <i>Acan</i>                        | ACTCAGGACATTAGCTGCATG        | CACGTGTTCCCATTCACTTTG  |
| <i>Runx1</i>                       | CGGGCAATGACGAAACTAC          | GGGTTTGTAAGACGGTGATG   |
| <i>Spp1</i>                        | TGGCTTACGGACTGAGGTCA         | GACCTCAGAAGATGAACTCT   |
| <i>Tnfaip6</i>                     | GTAGGAAGATACTGCGGTGAT<br>GAA | GACGGACGCATCACTCAGAA   |
| <i>Sox9</i>                        | AGGAAGCTGGCAGACCAGTA         | ACGAAGGGTCTCTTCTCGCT   |
| <i>Olr1</i>                        | ACGAGAAATCCAAAGAGCAGG        | TCCCATTCACTTCCAGTTG    |
| <i>Ppia</i>                        | TATCTGCACTGCCAAGACTGA<br>GG  | CTTCTTGCTGGTCTTGCCATCC |
| <i>Neat1</i>                       | GCAAGACCATGTGCCCTAGT         | TCTGGAATTGGCCGGAAGTC   |
| <i>H19</i>                         | TTGTCTGGCTTCATCCTGTG         | TGGACTTGGTGCCTGTATG    |
| <b>Rat ChIP<br/>qPCR primers</b>   |                              |                        |
| <i>Alivec</i> promoter             | TTGTACCTTGTCCCCAGTTG         | ATGCCCAACCCCATAGTTAG   |
| <b>Human gene<br/>qPCR primers</b> |                              |                        |
| <i>ALIVEC</i>                      | TGCCAAGCACCACTCTCAAT         | AAGGTCAATGCCAGACAGGG   |
| <i>ACAN</i>                        | TGCGGGTCAACAGTGCCTATC        | CACGATGCCTTTCACCACGAC  |
| <i>GAPDH</i>                       | CTTTTGCGTCGCCAGCCGAG         | CCAGGCGCCCAATACGACCA   |

**Supplementary Table S2. Complete sequence of *Alivec***

ATAAAAGCCTACGGTCCTTTTGTAGACATAGTTTCATTGCCAGACTGGCCTTGAATTC  
GCAATCATGAGAAGACACAGGTACCTTCAGTCCAACGACTGTTGCATTAATTAGCCA  
GGGTGAAACTTGGGGATGTCAAGGATAGAGAGTTAAAGTGATTTTCATGAAGAAAAG  
GTATTGTAGTGACTATCCCTGTTGTCAACTTGACTATCCAGAATTGGAAGGTTACCT  
GTGATCGAGGTCTTGGGGGCTGGGAGATACAAGTTTCTGACCTTGATCTTGTTCATGA  
AGATCTTCTATATCTGGAGTGAAGTAGAGGGCACAGTGGCTATGAATCCCAGGCAAG  
AAGATCTCTGAGTTCAAGGTCATCTGGGACAAAGCAAGTCCCAGATCCAGAAGTCT  
GGATTACACATCTTTAATCTGGGCTACACCTTCTGCTGGAGACCTACATAAGGACAT  
TGGAAGAAGGGAGATGCTCTCTGCCTGCTTGCTTGCCTTGTAGGACTGAGCCACTGC  
TAGATCTTTGGACTTCCAATCATAGCTGCTGCTGACCATTGTTGGGGAGTTGGACTA  
CAGACTGTAAGCCGTCAACAATTTCCCTTACATATAAAGACTACTCATAAGTTCTGT  
GACTCTAGAGAACCCTGACTAATATAGTGTTGCCTTCTGTTCTCGGCATCTGTCTTCA  
GATTCCTATTGCTGTGATAAAACACCATGGCCAAAAGCAACTTGGAAGAAAAGGGT  
TTGTGTCCCATCATCCAGGGACTTCGGCCAACAGCCAGCAGTGCAGACAAGGGCGG  
CATGGACCTGCAGCCTGTGGCTGGCCCCCGAGGGCGAGCAGCCAGATGCCGGCAGC  
CGCAGGAGAGAAGGGCTGCTCTTCTCTTCACTCAAAGGTGGATTGAGGAAGGTTGG  
CTCTGAGATTTTTTTTTTCAAGAAGCTCGTCGGGAGTGGGAGAATATGAACATCTGTG  
CCCTGGGTTTCAGTTCTGGACTCGGCTCAGGCCACAGTCTGGAGCTGGCGTCAGCTGG  
AGACAAGCCTGCATCCTGCTGGCGGGTGGGTGGGGCTGCTTCTGGCCTGCTGGTTGA  
GGAACGCAGACACTAGCCTCCACCCTCTGGAGCCCAGGAGAGCGGCGGGCATGGGA  
GGGCACACAGAGCTCTCAGCGCTCAGGCACCAGGGTGCCTGCATGTACTGTGTTTAC  
AGAAGGGCTGGGGGCAGGTCCTGGAGTCTCGCAGGTACACTCCACAGGGAAAGGCA  
CCCCAGGTCTTTCCCTCCCCCTCTGCCTTTGGTGACAGGCATTTGTGGCCAATACTG  
ATGTTCTCTCTACACTTTATTCCCAGTCCCAGTTGTTTCATCAAGGCTGCAAGACAAT  
CCAGAAATTACCTAGTCAACTGGTTTTTCCCTGACCTTTGCTTTTTTTTAACTTAGCC  
TATTTTTTTTAACTTAAATTTTAGTGTGAAAAGGTAGTATATTTTGCTGGGGATATAGC  
TCAGTTGGCAGAGGGCTTGCTTAGCATGTACCACTAGGCCCTGGATTTGAGCCCCAA  
CACCACACAACTAGGCATGTTGCTGTAAGTCAATAAACCCAATCAATACTCTGGAA  
GTTCAAGATCTTCCTCAACTATCTATCCAGTTCAAAAACCAGTTTAAAAGAAAACAGT

GTATTTACATGGTTCACATTTTTTAAACGCTTAAATTGGTATCAATCTATATTTATATC  
TATCTATATATCTATATATCATCTATATCCATCTTTATCTCCATCTCTCTCTCCTCTCT  
GTCATCTATCTATATATCTCACACTTATCTGGATTTCATCTGCCCTTCTTTTCACCATG  
CCTTCCTACCTCATAGCCACAGTAAGATATGTACTAGCTTCAGGTGTACCGCTTCTT  
GGCTGGGTTTGTTTAGTAGCACACACCTTTAATCTCAGTACTGGGAGGCAGAAGAAG  
ACAGATCTTATGAATGTGAGGCCAGCCTGGTCTACATAGAAAGTTCTAGGCCAGCCA  
AGACTACATAATGAGATTCTGTCTCTAACAAACAAATCCTTATACAGTTTTGAAATG  
AAAATTGAGAATTAAAAATTTTCATATCAAAAAGTAGCTTTTACTTCATTACTTTATTT  
TATTATGTAATAAATTGTGTACAATATATTTTCTATATTTTGTTTTGTGGATAAAC  
ATTATTAGCACTAAGATGCAATCCACAGACCACAGGAAGCTCAAGAAGAAGGATGA  
CCAAAATGCGGATGCTCTCACTCCTTCTTAAAAGGGGCAAAAAAAAAA



**Supplementary Table S3. Sequences of GapmeRs and siRNAs used in the study**

| GapmeR or siRNA                     | Sequence                                                                                     | Vendor or source |
|-------------------------------------|----------------------------------------------------------------------------------------------|------------------|
| Alivec Gap1                         | GCAACAGTCGTTGGAC                                                                             | QIAGEN           |
| Alivec Gap2                         | TTGAACTTCCAGAGTA                                                                             | QIAGEN           |
| Alivec Gap3<br>( <i>AlivecGap</i> ) | GATTGCATCTTAGTGC                                                                             | QIAGEN           |
| Negative control<br>Gap (NCGap)     | AACACGTCTATACGC                                                                              | QIAGEN           |
| Sox9 siRNA pool                     | GCGUCAAACGGCUCCAGCAA;<br>GCUCGGAACUGUCUGGAAA;<br>GCCAGGUGCUGAAGGGCUA;<br>GUAAGUGAAGGUAACGAUU | Horizon          |

**Supplementary Table S4. Antibodies used in the study and their source**

| Target protein | Vendor or source | Antibody & Cat No.        |
|----------------|------------------|---------------------------|
| Tnfaip6        | Proteintech      | Anti-TSG6, 13321-1-AP     |
| Runx1          | Proteintech      | Anti-RUNX1,19555-1-AP     |
| Tpm3           | Genetex          | Anti-Tpm3, GTX113568      |
| hnRNPA2B1      | Origene          | Anti-hnRNPA2B1, TA3140    |
| Alpha-SMA      | Abcam            | Anti-SMA, ab5694          |
| Tagln (SM22)   | Proteintech      | Anti-TAGLN, 10493-1-AP    |
| Acan           | Proteintech      | Anti-aggrecan, 13880-1-AP |
| Sox9           | Millipore        | Anti-Sox9, AB5535         |
| Beta-actin     | Sigma-Aldrich    | Anti-b-Actin, A5441       |
